# Supplementary material
Source: publisher figshare collection journal article supplement (https://acs.figshare.com/ndownloader/files/12354266)
Supplement: Supplementary file 1 [file 12354266]

## Supporting Information

### Cyclic Regulation of Sulfilimine Bond in Peptides and NC 1 Hexamers *via* HOBr/H<sub>2</sub>Se Conjugated System

Dongrui Luan,<sup>‡</sup> Xiaonan Gao,<sup>‡</sup> Fanpeng Kong, Xiaoxiao Song, Aishan Zheng,  
Xiaojun Liu, Kehua Xu\* and Bo Tang\*

College of Chemistry, Chemical Engineering and Materials Science, Collaborative Innovation Center of Functionalized Probes for Chemical Imaging in Universities of Shandong, Key Laboratory of Molecular and Nano Probes, Ministry of Education, Institute of Molecular and Nano Science, Shandong Normal University, Jinan, 250014, P. R. China.

\*E-mail: tangb@sdsu.edu.cn; xukehua@sdsu.edu.cn

## Table of Contents

|                                                                                  |        |
|----------------------------------------------------------------------------------|--------|
| 1. Experimental Section.....                                                     | P3     |
| 2. Supplementary Figures .....                                                   | P4-P10 |
| Figure S1: Time-dependent changes in the fluorescence intensities.....           | P4     |
| Figure S2: Fluorescence intensities changes at different pH values.....          | P4     |
| Figure S3: Fluorescent intensities towards metal ions and amino acids.....       | P5     |
| Figure S4: MTT assays of the HepG2 cells' viability.....                         | P5     |
| Figure S5: Fluorescence confocal microscopic images.....                         | P6     |
| Figure S6: HRMS spectrum for DL-2-Amino-4-(methylthio) butyric acid.....         | P6     |
| Figure S7: HRMS spectrum of L-2,6-Diaminohexanoic acid.....                      | P7     |
| Figure S8: HRMS spectrum for the mixture of DL-Met and L-Lys.....                | P7     |
| Figure S9: HRMS spectrum for the new sulfilimine-cross-linked peptide.....       | P8     |
| Figure S10: HPLC spectrum of the dipeptide Met-Lys.....                          | P8     |
| Figure S11: ESI-MS spectrum of the dipeptide Met-Lys.....                        | P9     |
| Figure S12: HRMS spectrum of the dipeptide Met-Lys.....                          | P9     |
| Figure S13: HRMS spectrum of the sulfilimine-cross-linked dipeptide Met-Lys..... | P10    |
| Figure S14. Uncropped SDS-PAGE gels scan for Figure 4a.....                      | P10    |
| 3. References.....                                                               | P10    |

## 1. Experimental Section

### MTT cytotoxicity assay

HepG2 cells (20,000 cell/mL) were evaluated within replicate 96-well microtiter plates to a total volume of 200  $\mu$ L/well. Plates were maintained at 37 °C in a 5% CO<sub>2</sub>/95% air incubator. HepG2 cells were then incubated for 24 h upon different concentrations of the probes (0, 50, 100, 200, 300, 400 and 500  $\mu$ M), respectively. Then the culture media were removed and MTT solution (5 mg/mL) was added to each well with 200  $\mu$ L for 4 h at 37°C. After 4 h, the remaining MTT solution was removed, and 100  $\mu$ L of DMSO was added to each well to dissolve the formazan crystals. After gently shaken for 10 min, absorbance was measured at 490 nm using a microliter plate reader.

The cell viability rate (VR) was calculated according to the following formula:  $VR = A_{490}(\text{sample})/A_{490}(\text{control}) \times 100\%$ . The cell survival rate from the control group was considered to be 100%. Calculation of IC<sub>50</sub> values is 582.04  $\mu$ M according to Huber and Koella, which clearly demonstrated that the probe was of low toxicity to cultured cell lines under the experimental conditions.

## 2. Supplementary Figures

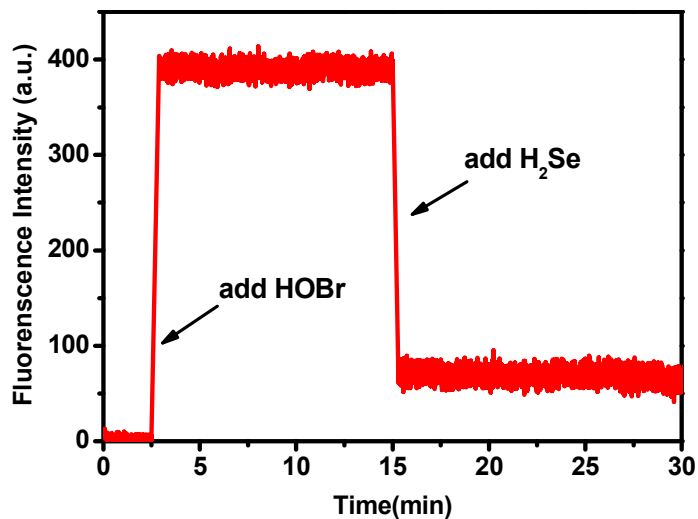

**Figure S1.** Time-dependent fluorescence intensities changes recorded at  $\lambda_{\text{ex}}/\lambda_{\text{em}} = 480/525$  nm for treatment of BPP (5  $\mu\text{M}$ ) with HOBr (20  $\mu\text{M}$ ) and cBPP (5  $\mu\text{M}$  BPP reacted with 20  $\mu\text{M}$  HOBr) with  $\text{H}_2\text{Se}$  (100  $\mu\text{M}$ ), respectively. Data was acquired in 10 mM PBS, pH 7.4, at room temperature. Slit widths: 10/10 nm.

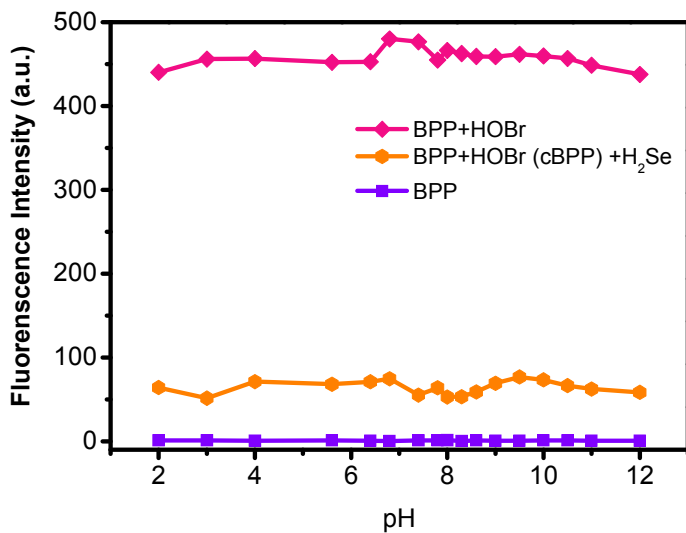

**Figure S2.** Fluorescence intensity changes of 5  $\mu\text{M}$  BPP (purple line) at different pH values in the presence of 20  $\mu\text{M}$  HOBr (pink line), 20  $\mu\text{M}$  HOBr plus 100  $\mu\text{M}$   $\text{H}_2\text{Se}$  (orange line). Data was acquired in 10 mM PBS, pH 7.4, at room temperature. Slit widths: 10/10 nm.  $\lambda_{\text{ex}}/\lambda_{\text{em}} = 480/525$  nm.

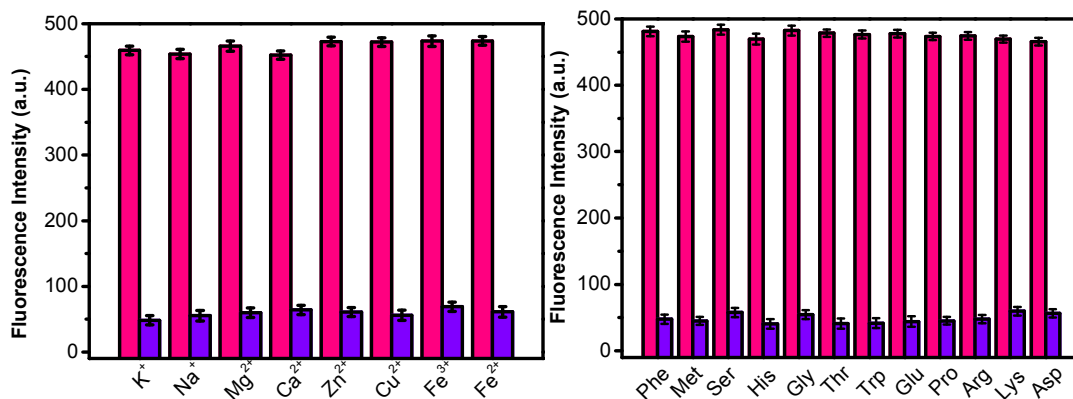

**Figure S3.** Fluorescent intensities of cBPP (5  $\mu$ M BPP reacted with 20  $\mu$ M HOBr) to metal ions and amino acids (pink bars). 100  $\mu$ M H<sub>2</sub>Se were added into the reaction mixture afterwards (violet bars): (left) Zn<sup>2+</sup>, Fe<sup>2+</sup> and Fe<sup>3+</sup> (200  $\mu$ M); K<sup>+</sup>, Na<sup>+</sup>, Mg<sup>2+</sup>, Ca<sup>2+</sup> and Cu<sup>2+</sup> (1 mM); (right) phenylalanine (Phe), methionine (Met), serine (Ser), histidine (His), glycine (Gly), tyrosine (Thr), tryptophan (Trp), glutamic acid (Glu), proline (Pro), arginine (Arg) Lysine (Lys) and aspartic acid (Asp) (1 mM). Spectra were acquired in 10 mM phosphate buffer, pH 7.4 at room temperature.  $\lambda_{\text{ex}}/\lambda_{\text{em}} = 480/525$  nm.

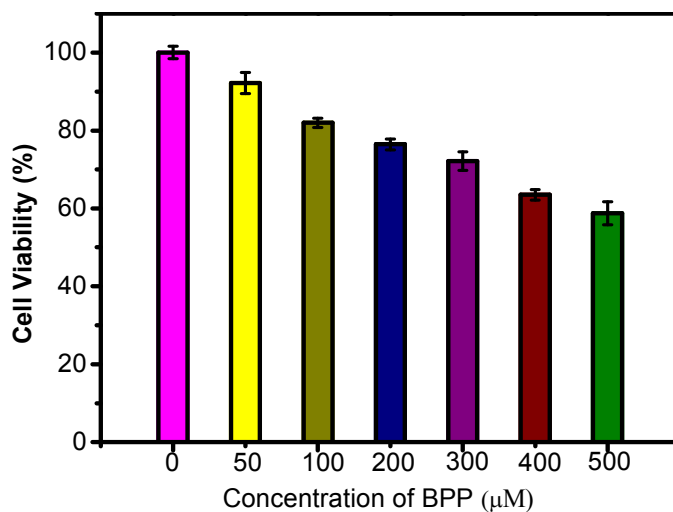

**Figure S4.** MTT assays of the HepG2 cells' viability upon incubation with different concentrations of BPP.

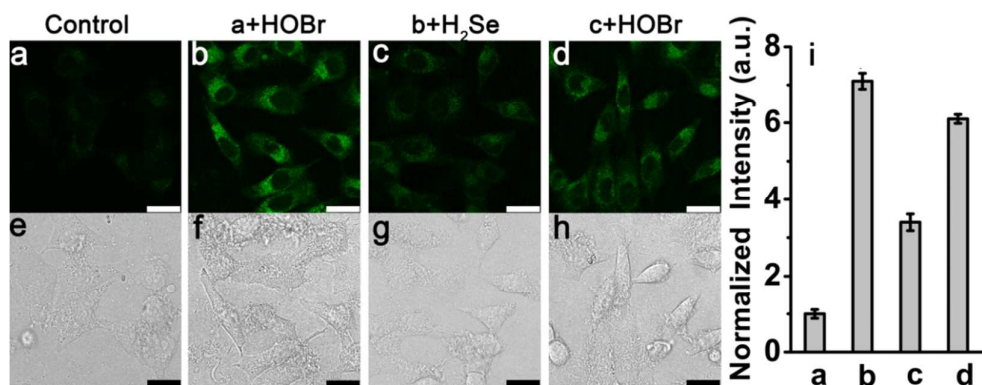

**Figure S5.** Fluorescence confocal microscopic images of HepG2 cells loaded with 25 μM BPP and exposed to cycles between HOBr and H<sub>2</sub>Se in different visual fields. (a) HepG2 cells were incubated with 25 μM BPP under 37 °C for 30 min in DMEM; (b) Cells were treated with 50 μM HOBr for 30 min; (c) Cells incubated with 100 μM H<sub>2</sub>Se for 30 min; (d) Cells were treated with another 50 μM HOBr for 30 min. (e-h) The bright-field images were corresponding to (a-d). (i) Graph showing quantification of mean fluorescence intensities in (a-d) correspondingly. Scale bars = 25 μm. Fluorescence images were acquired using a confocal microscope with 488 nm excitation and 500–600 nm collection.

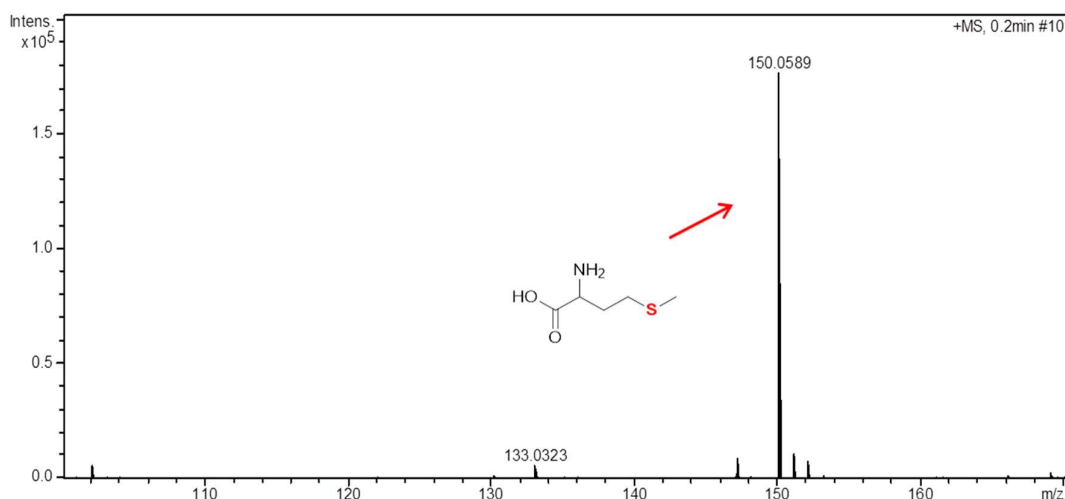

**Figure S6.** HRMS spectrum for DL-2-Amino-4-(methylthio) butyric acid (DL-Met)

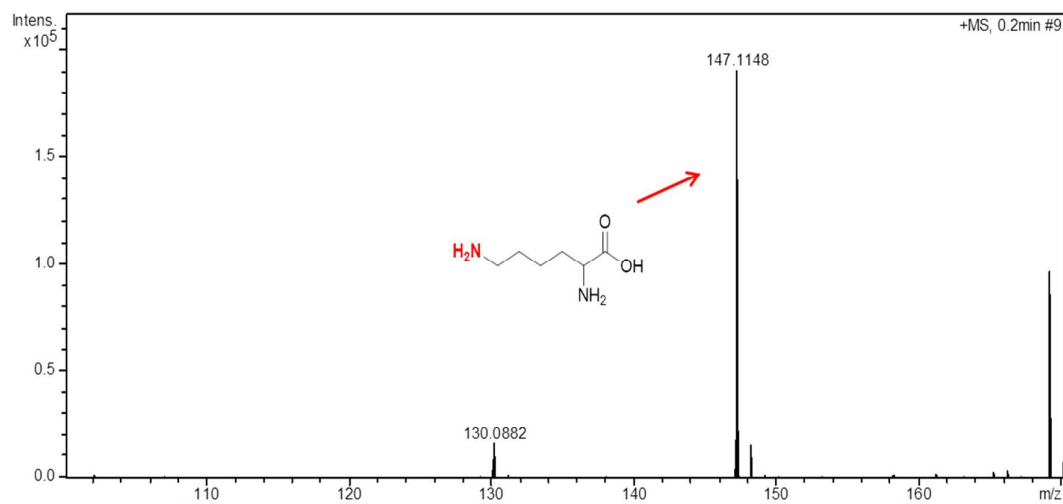

**Figure S7.** HRMS spectrum for L-2,6-Diaminohexanoic acid (L-Lys).

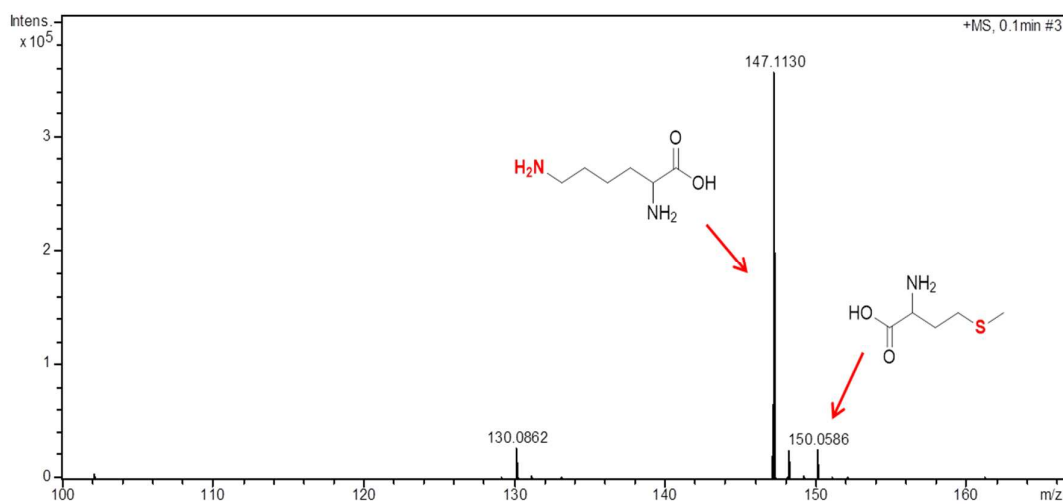

**Figure S8.** HRMS spectrum for the mixture of 1 mM DL-Met and 1 mM L-Lys.

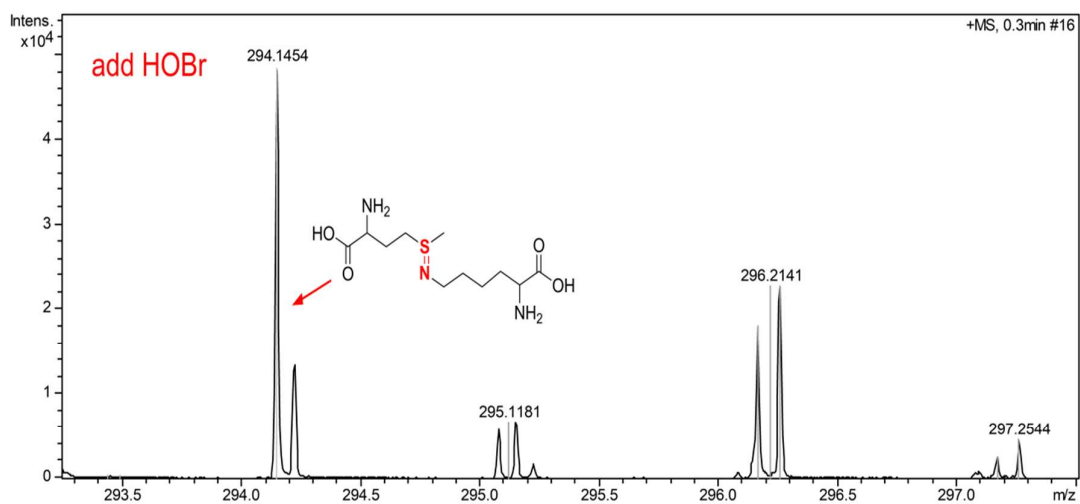

**Figure S9.** HRMS spectrum for the sulfilimine-cross-linked peptide by adding HOBr again.

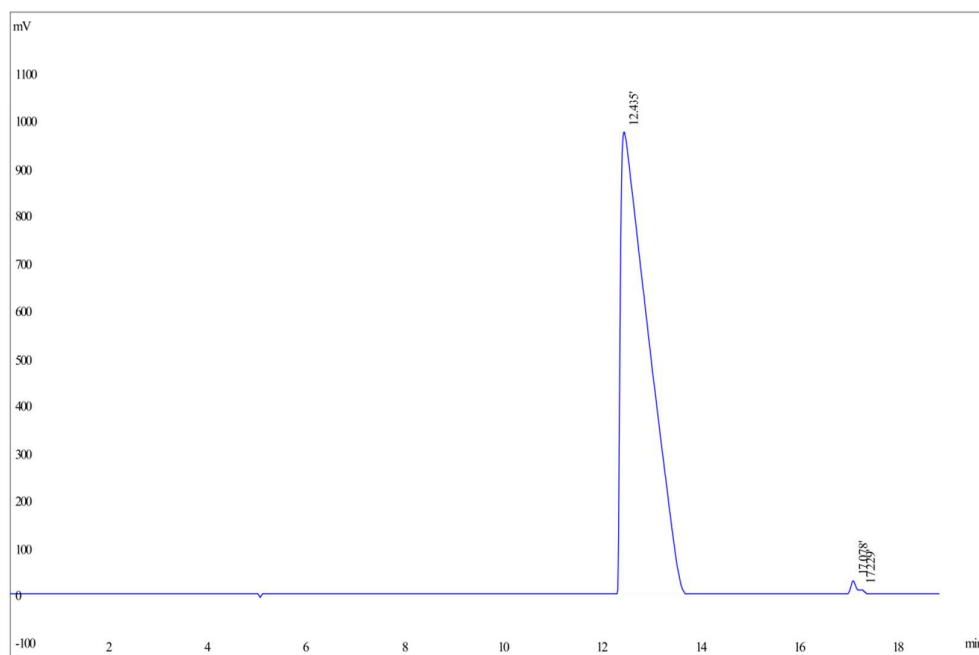

**Figure S10.** HPLC spectrum of the dipeptide Met-Lys.

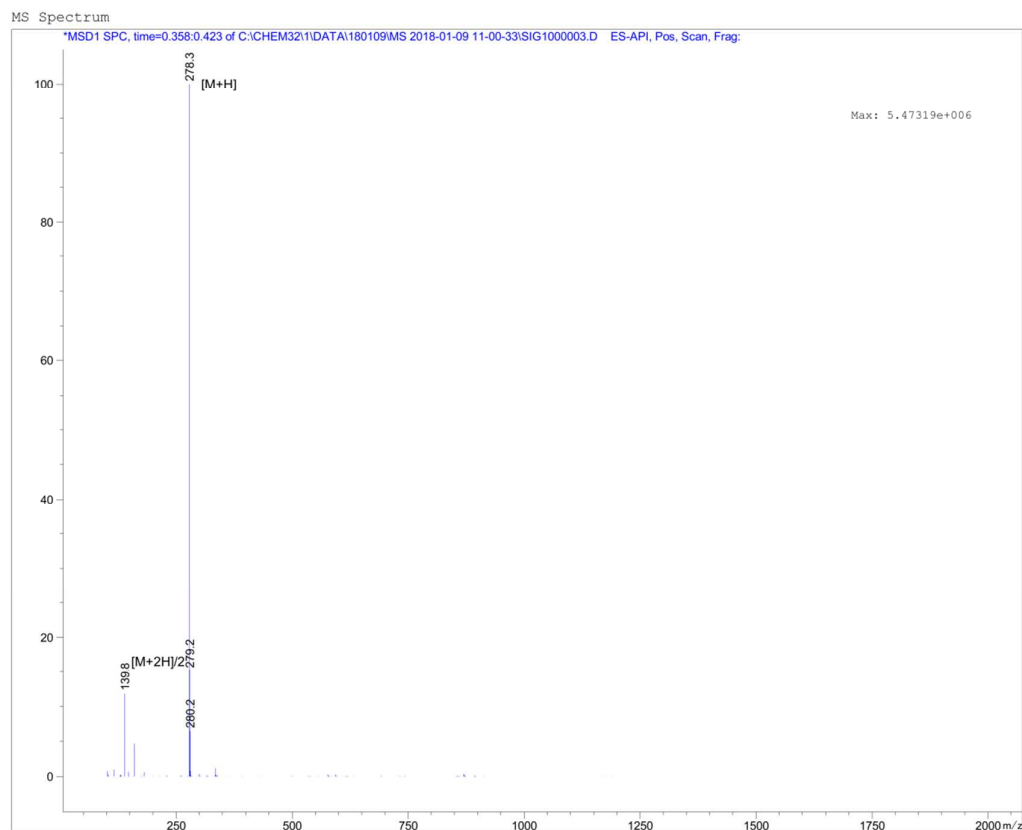

**Figure S11.** ESI-MS spectrum of the dipeptide Met-Lys.

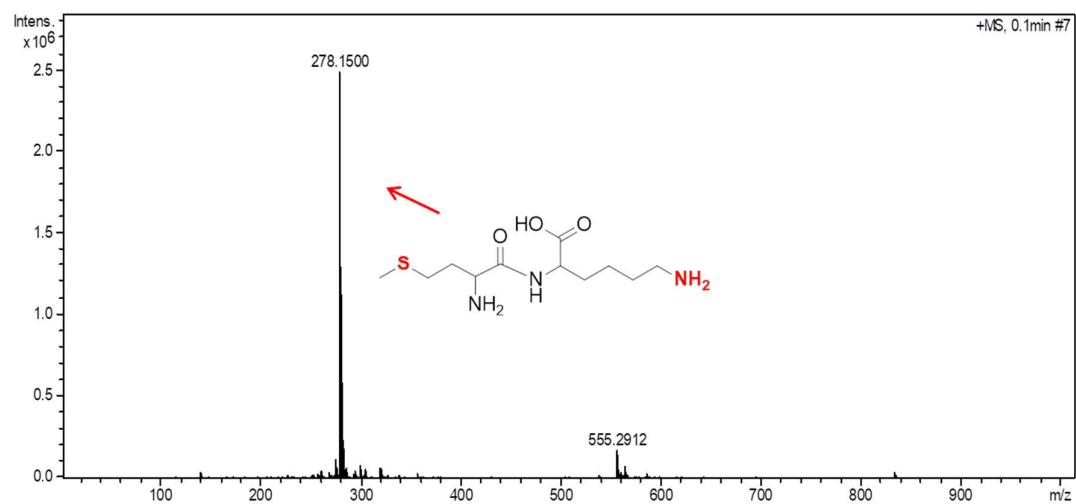

**Figure S12.** HRMS spectrum of the dipeptide Met-Lys.

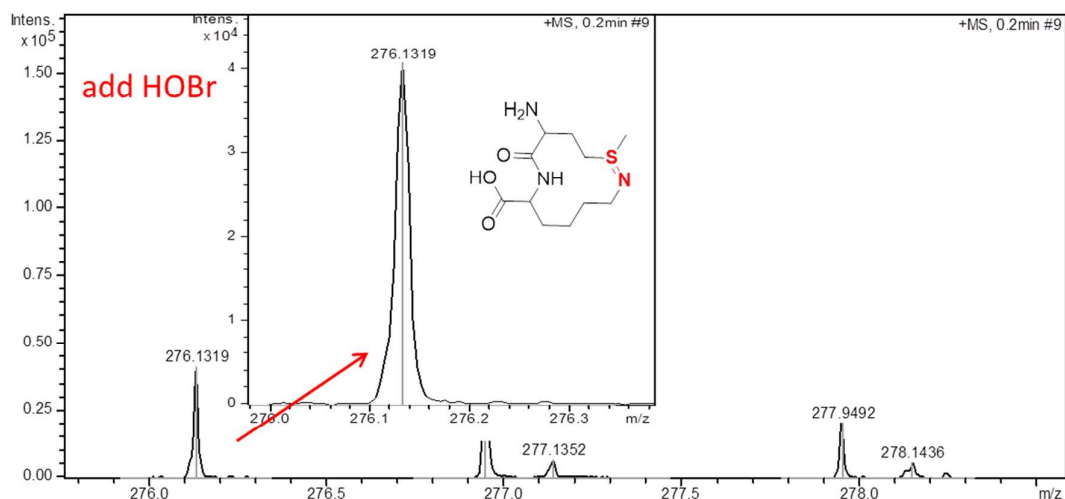

**Figure S13.** HRMS spectrum of the sulfilimine-cross-linked dipeptide Met-Lys by adding 2 mM HOBr again.

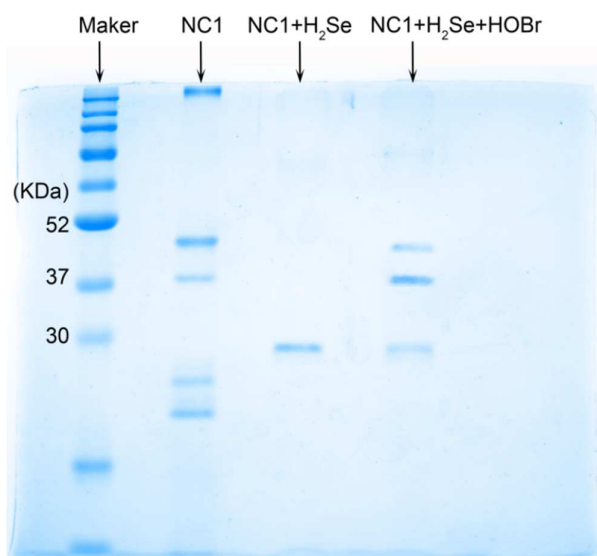

**Figure S14.** Uncropped SDS-PAGE gels scan for Figure 4a. SDS-PAGE comparison of NC1 banding patterns from bovine glomerular basement membrane (GBM), NC1 fraction (15  $\mu$ g) treated with 100  $\mu$ M  $H_2Se$  for 5 min, and NC1 fraction (15  $\mu$ g) first treated with 100  $\mu$ M  $H_2Se$  for 5 min and then reacted with freshly prepared HOBr (200  $\mu$ M) for 5 min at room temperature. The reaction was quenched with 20 mM Met. NC1 fraction analyzed by 12% nonreducing SDS-PAGE and visualized by staining with Coomassie blue.

### 3. References:

(1) Xu, K.; Luan, D.; Wang, X.; Hu, B.; Liu, X.; Kong, F.; Tang, B. *Angew. Chem., Int. Ed.* **2016**, 55, 12751-12754.
